# Supplementary material for: A novel calcium fluorinated alkoxyaluminate salt as a next step towards Ca metal anode rechargeable batteries
Source: Royal Society of Chemistry journal article supplement (doi:10.1039/d3ta02084c), 2023-01-01
Supplement: d3ta02084c1.pdf [file d3ta02084c1.pdf]

*Supporting Information*

**A novel calcium fluorinated alkoxyaluminate salt as a next step towards Ca metal anode rechargeable batteries**

Tjaša Pavčnik<sup>1,2</sup>, Juan D. Forero-Saboya<sup>3</sup>, Alexandre Ponrouch<sup>3,4</sup>, Ana Robba<sup>2</sup>, Robert Dominko<sup>1,2,4</sup>,  
Jan Bitenc<sup>1,2\*</sup>

<sup>1</sup>National Institute of Chemistry, Hajdrihova 19, 1000 Ljubljana, Slovenia

<sup>2</sup>Faculty of Chemistry and Chemical Technology, University of Ljubljana, Večna pot 113, 1000, Ljubljana, Slovenia

<sup>3</sup>Institut de Ciència de Materials de Barcelona, ICMAB-CSIC, Campus UAB, 08193 Bellaterra, Spain

<sup>4</sup>Alistore-European Research Institute, CNRS FR 3104, Hub de l'Énergie, Rue Baudelocque, 80039 Amiens, France

\*Corresponding author: [jan.bitenc@ki.si](mailto:jan.bitenc@ki.si)

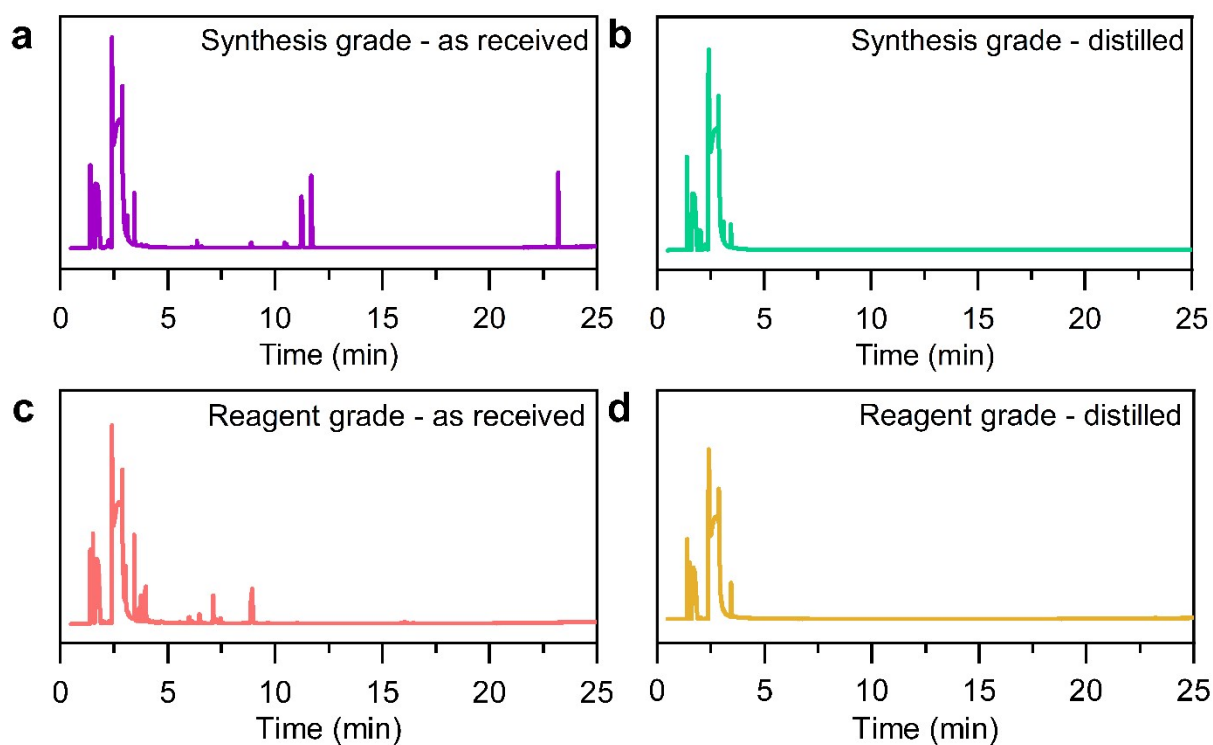

**Figure S1:** Chromatograms of DME solvents: synthesis grade – **a)** as received and **b)** after drying/purification procedure including fractional distillation; reagent grade – **c)** as received and **d)** after drying/purification procedure including fractional distillation.

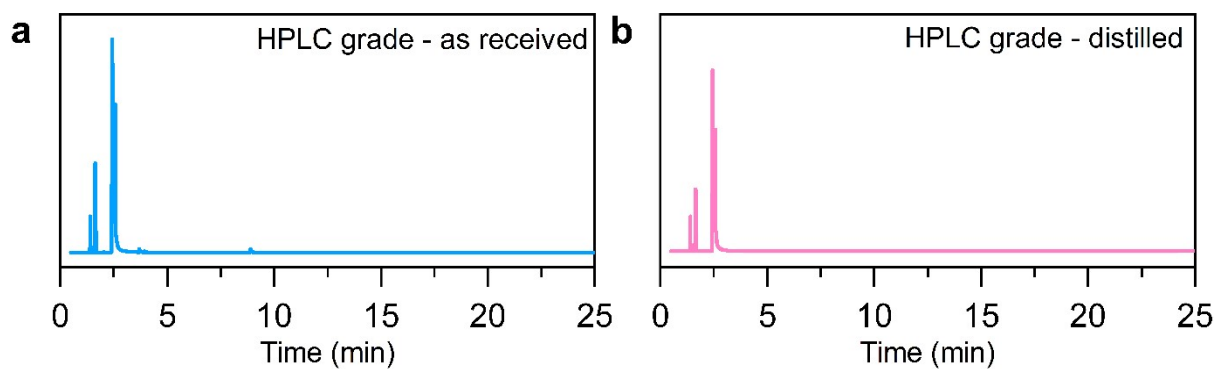

**Figure S2:** Chromatograms of DME solvents: chromatographic (HPLC) grade – **a)** as received and **b)** after drying/purification procedure including fractional distillation.

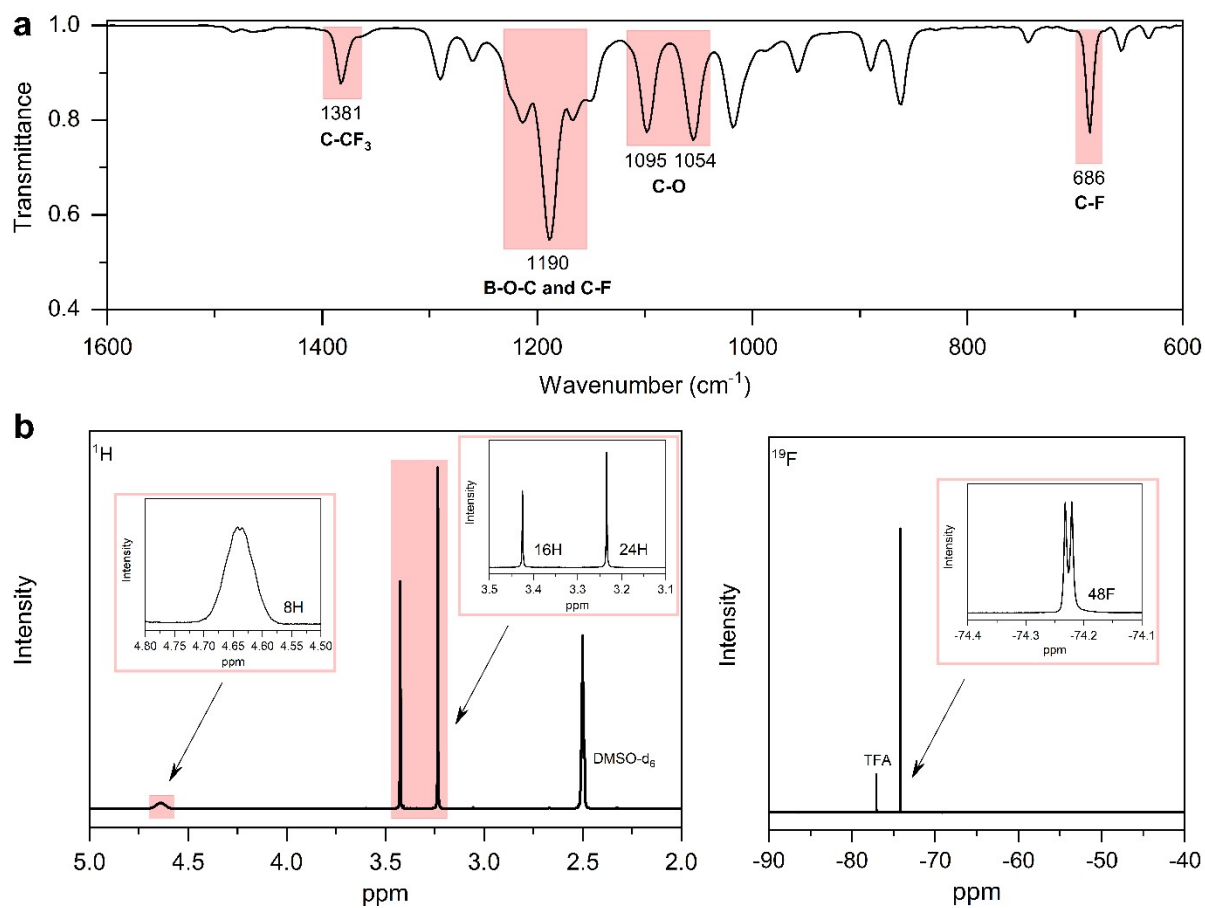

**Figure S3: a)** ATR-IR spectrum of CaBhfip with peak assignment. **b)**  $^1\text{H}$  (right) and  $^{19}\text{F}$  (left) NMR spectra of CaBhfip with peak assignment.

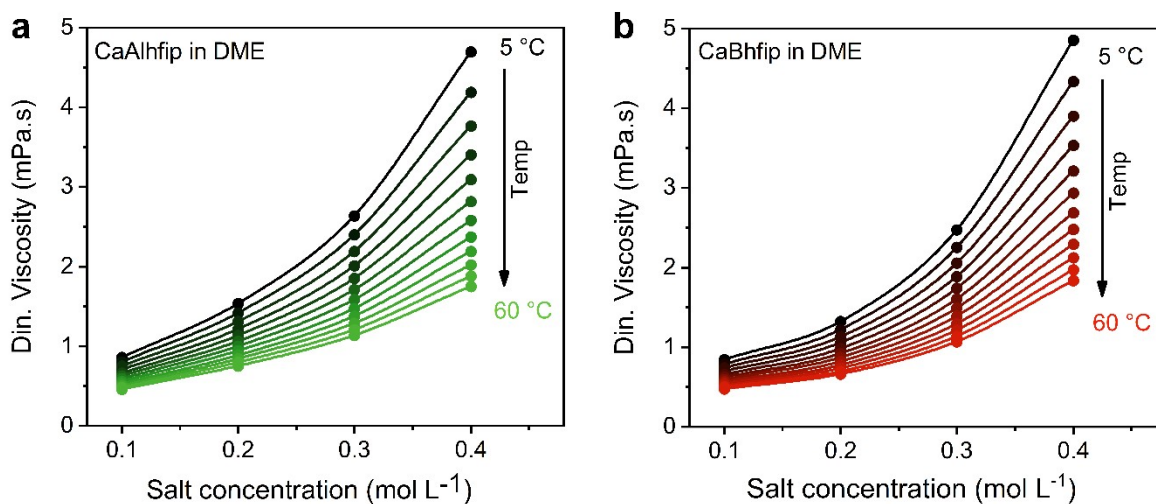

**Figure S4:** Viscosity of electrolytes in DME at different temperatures as function of salt concentration. **a)** CaAlhfip, **b)** CaBhfip. Lines added only as visual aid, the markers indicate experimental data points.

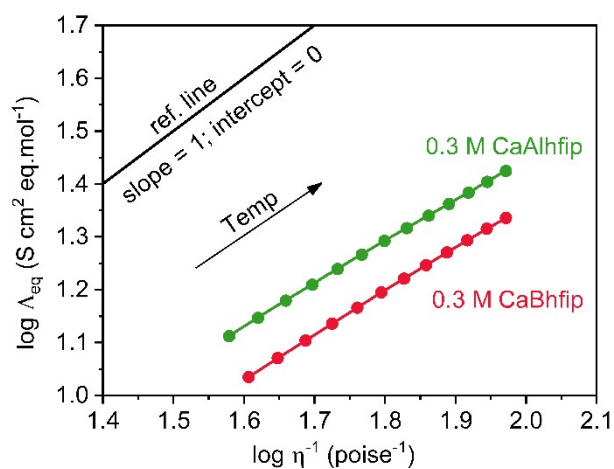

**Figure S5:** Walden plot of 0.3 M CaAlhfip and 0.3 M CaBhfip in DME. The plot was constructed using the viscosity and ionic conductivity of the electrolytes measured at different temperatures between 5 and 60 °C.

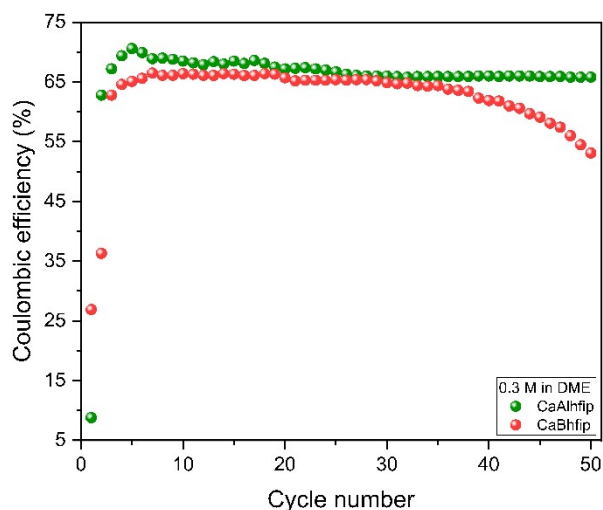

**Figure S6:** Coulombic efficiency for Ca plating/stripping in 0.3 M CaAlhfp and CaBhfp electrolytes in DME with a 2-electrode cell setup. The efficiencies were calculated manually from CV curves (**Figure 3, a and b**) by dividing the area under the curve for Ca stripping with the area above the curve for Ca plating.

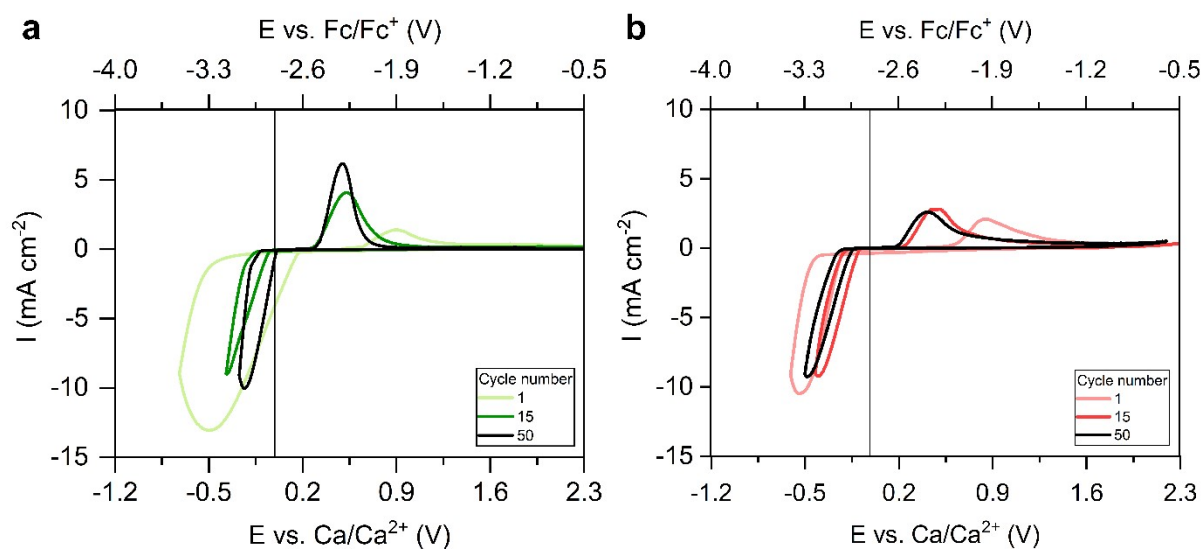

**Figure S7:** Selected CV cycles of Ca plating/stripping in **a)** 0.3 M CaAlhfp/DME and **b)** 0.3 M CaBhfp/DME with a 3-electrode cell setup (Ca CE, SS WE, Ag RE) at  $25 \text{ mV s}^{-1}$ . Potential of reference electrode is calibrated with respect to ferrocene redox couple.

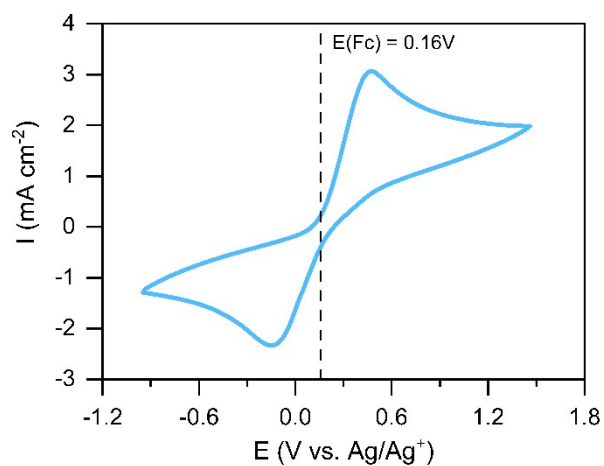

**Figure S8:** The redox potential of ferrocene (Fc) vs. Ag reference electrode measured in 3-electrode cell configuration using Ca as counter, SS as working and Ag as reference electrode at  $25 \text{ mV s}^{-1}$ .

**Table S1:** EDX analysis of deposits from 0.3 M CaAlhfip/DME electrolyte with reported average values of five measurements for each element.

| No.            | Ca   | O    | C    | F    | Al  |
|----------------|------|------|------|------|-----|
| 1              | 58.2 | 17.9 | 6.7  | 13.7 | 3.5 |
| 2              | 50.9 | 20.7 | 8.7  | 5.2  | 2.2 |
| 3              | 46.4 | 31.8 | 8.6  | 11.9 | 1.3 |
| 4              | 47.8 | 30.8 | 8.6  | 11.4 | 1.4 |
| 5              | 45.5 | 35.1 | 13.7 | 4.9  | 0.8 |
| <b>Average</b> | 49.8 | 27.3 | 9.3  | 9.4  | 1.8 |

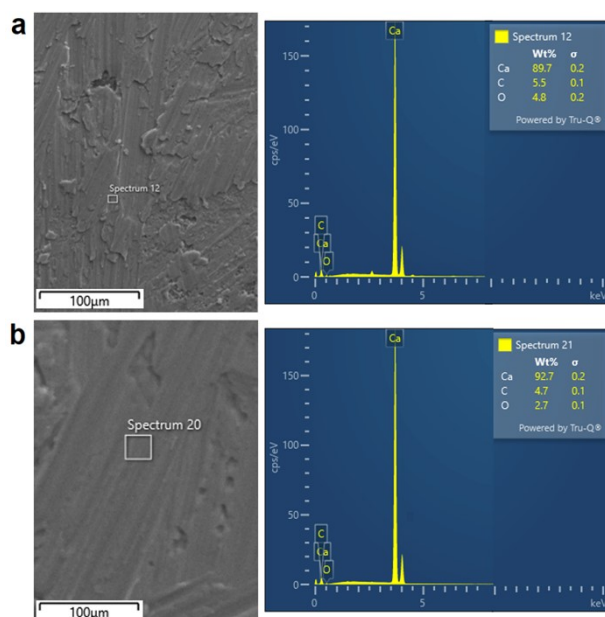

**Figure S9:** a) SEM image and corresponding EDX spectra of Ca metal dipped into DME and b) fresh Ca metal.

**Table S2:** EDX analysis of deposits from 0.3 M CaBhfp/DME electrolyte with reported average values of five measurements for each element.

| No.            | Ca          | O           | C          | F          |
|----------------|-------------|-------------|------------|------------|
| 1              | 50.8        | 37.4        | 6.1        | 5.7        |
| 2              | 45.6        | 32.6        | 12.3       | 9.4        |
| 3              | 50.9        | 37.1        | 7.4        | 4.6        |
| 4              | 51.6        | 35.4        | 4.7        | 8.3        |
| 5              | 45.5        | 31.8        | 14.4       | 8.4        |
| <b>Average</b> | <b>48.9</b> | <b>35.3</b> | <b>9.2</b> | <b>7.3</b> |

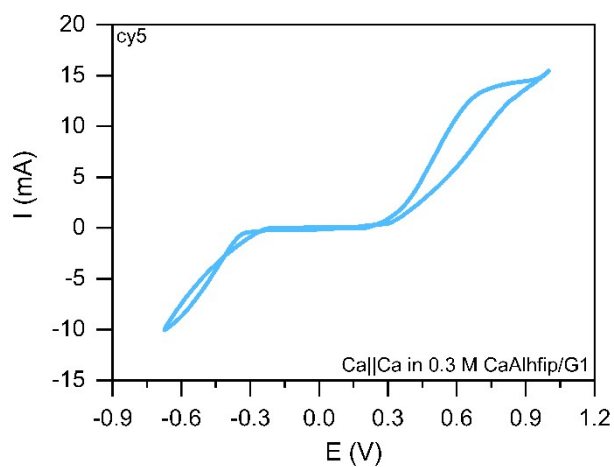

**Figure S10:** 5<sup>th</sup> CV cycle of Ca plating/stripping in 0.3 M CaAlhfp/DME with a 2-electrode symmetrical Ca || Ca cell (Ca CE, Ca WE) at 25 mV s<sup>-1</sup>.

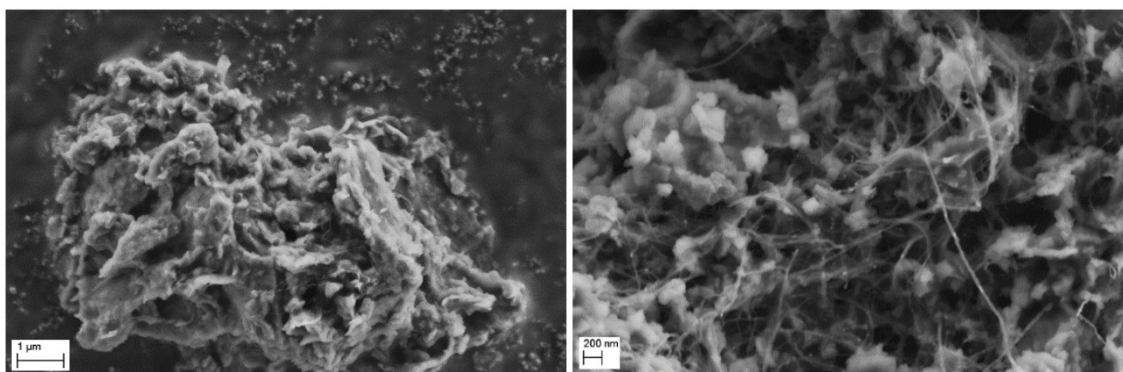

**Figure S11:** SEM micrographs of naphthalene-hydrazine diimide polymer nanostructured with MWCNTs.

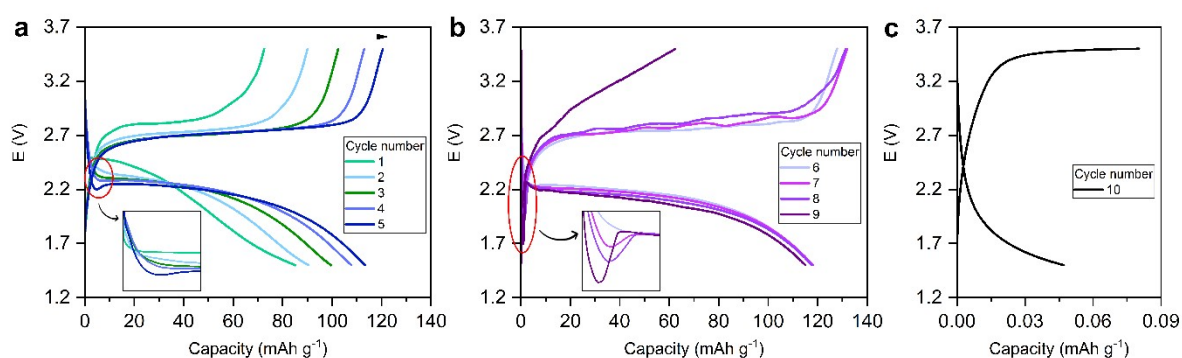

**Figure S12:** Discharge/charge profiles of Ca metal – NP battery in 0.3 M CaAlhfip/DME at C/4 and voltage window from 1.5 to 3.5 V: **a)** cycles 1–5; **b)** cycles 6–9; **c)** cycle 10. Inset areas represent voltage dips due to the increase of overpotential on anode.

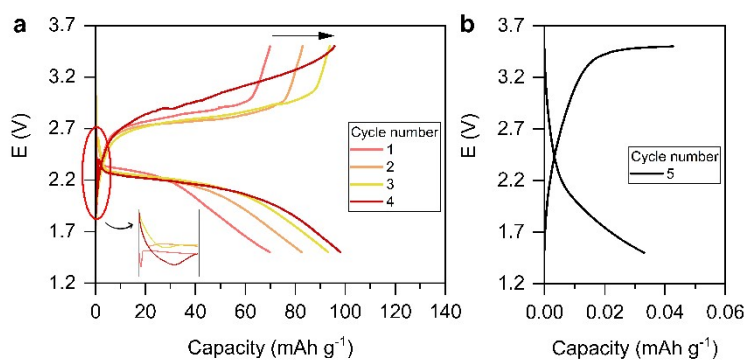

**Figure S13:** Discharge/charge profiles of Ca metal – NP battery in 0.3 M CaBhfip/DME at C/4 and voltage window from 1.5 to 3.5 V: **a)** cycles 1–4; **b)** cycle 5. Magnified areas represent voltage dips due to the increase of overpotential on anode.
